# Supplementary material for: A Combined Approach for the Characterization of Small Ruminant Lentivirus Strains Circulating in the Islands and Mainland of Greece
Source: MDPI journal article supplement (doi:10.3390/ani14071119), 2024-04-06
Supplement: s1 [file s1]

Supplementary Table S1

| Primer name     | Sequence                       | Position *   |
|-----------------|--------------------------------|--------------|
| GAG 1st For     | 5'-TGGTGARKCTAGMTAGAGACATGG-3' | 513 to 536   |
| GAG F2 2nd For  | 5'-CAAACWGTRGCAATGCAGCATGG-3'  | 1010 to 1032 |
| POL R1 1st Rev  | 5'-CATAGGRGGHGCCGGACGGCASC-3'  | 1830 to 1852 |
| POL R24 2nd Rev | 5'-GCCGGACGGCASCACACG-3'       | 1826 to 1842 |

Table. Primers used in this study from Grego et al. 2007. Primer name, sequence and position related to CAEVGC reference sequence (GenBank Acc. Num. M33677.1) are provided.
